# Supplementary material for: Benzocyclobutene-functional double-decker silsesquioxane: self-assembled hybrid resin for high-performance dielectrics and LED encapsulants
Source: Royal Society of Chemistry journal article supplement (doi:10.1039/c9py00719a), 2019-01-01
Supplement: c9py00719a1.pdf [file c9py00719a1.pdf]

# Benzocyclobutene-functional Double-Decker Silsesquioxane: Self-Assembled Hybrid Resin for High-Performance Dielectric and LED Encapsulants

Huan Hu,<sup>a</sup> Jiajun Ma,<sup>a</sup> Xian Li,<sup>a</sup> Qiang Yin,<sup>\*b</sup> Li Fan,<sup>a</sup> Xuelian Wei,<sup>a</sup> Qiuxia Peng,<sup>a</sup> Junxiao Yang<sup>\*a</sup>

<sup>a</sup> State Key Laboratory of Environmental-friendly Energy Materials, School of Material Science and Engineering, Southwest University of Science and Technology, Mianyang 621010, P. R. China

<sup>b</sup> Research Center of Laser Fusion, China Academy of Engineering Physics, Mianyang 621900, P. R. China

\*E-mail: yangjunxiao@swust.edu.cn (Pro. Yang) and qyin839@sina.com (Dr. Yin)

## CONTENTS

**Page2: Fig. S1:** Performance comparison of the **BCB-DDSQ** resins with current encapsulant materials

**Page3: Fig. S2:** Possible schematic curing mechanism of **4BCB-DDSQ**

**Page4: Fig. S3:** <sup>1</sup>H NMR spectrum of **DDSQ-2H**

**Page5: Fig. S4:** <sup>1</sup>H NMR spectrum of **DDSQ-4H**

**Page6: Fig. S5:** <sup>13</sup>C NMR spectrum of **2BCB-DDSQ**

**Page7: Fig. S6:** <sup>13</sup>C NMR spectrum of **4BCB-DDSQ**

**Page8: Fig. S7:** XRD spectra of **DDNa**, **DDSQ-2H** and **DDSQ-4H**

**Page9: Fig. S8:** XRD spectra of **DVSBCB**, **p-2BCB-DDSQ** and **p-2BCB-DDSQ**

**Page10: Fig. S9:** N<sub>2</sub> adsorption-desorption isotherms and BJH-analyzed pore-size distribution of **p-2BCB-DDSQ** and **p-4BCB-DDSQ** resins

**Page11: Fig. S10:** Static contact angle of water on the surface of cured **BCB-DDSQ** resins

**Page12: Fig. S11:** The transmittance of cured **BCB-DDSQ** resins

**Page13: Table. S1:** The data of nanoindentation tests for the **p-DVSBCB**, **p-2BCB-DDSQ** and **p-4BCB-DDSQ**

## Supporting Information

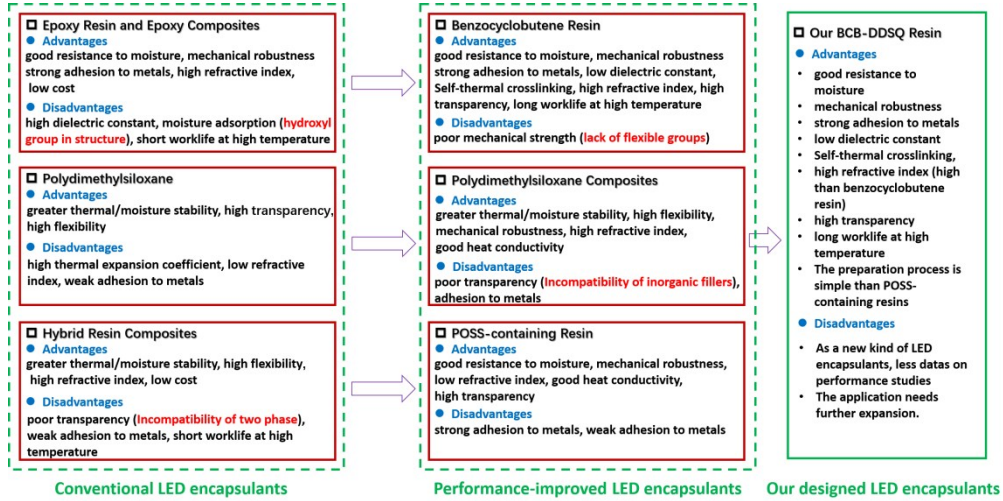

**Fig. S1:** Performance comparison of the BCB-DDSQ resins with current encapsulants materials

## Supporting Information

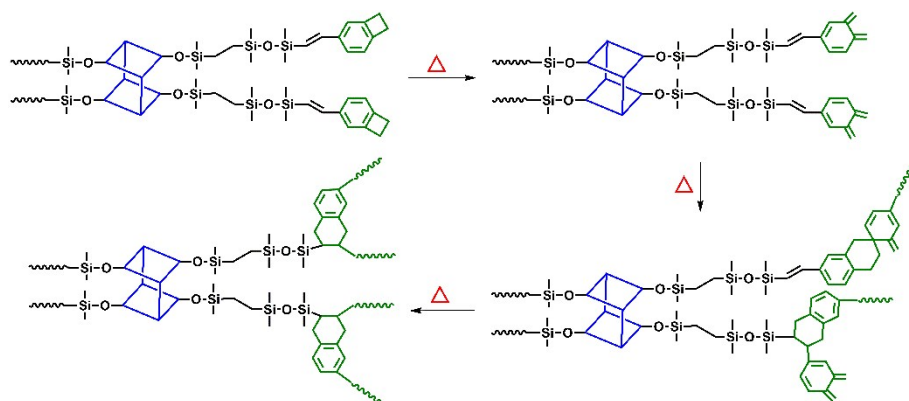

**Fig. S2.** Possible schematic curing mechanism of **4BCB-DDSQ**

(When the temperature was above 180 °C, the four-membered ring of BCB opened and formed an o-quinodimethane active intermediate which can couple with each other or react with other olefins by Diels–Alder reactions.)

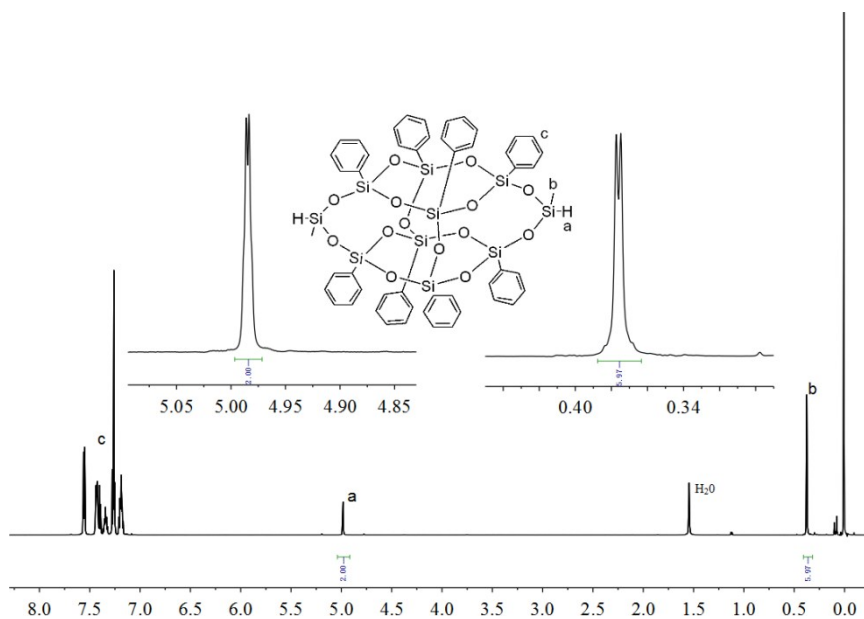

Fig. S3.  $^1\text{H}$  NMR spectrum of DDSQ-2H

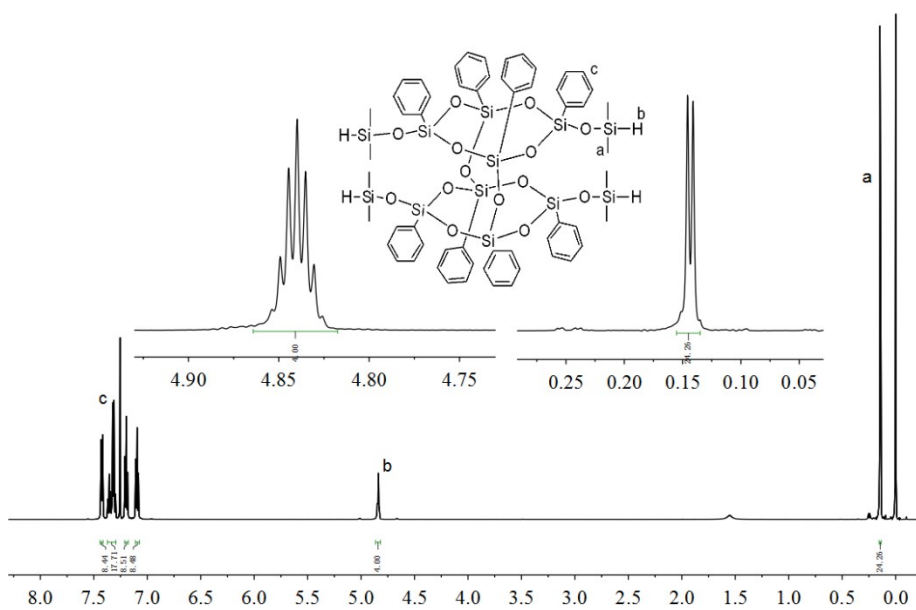

Fig. S4. <sup>1</sup>H NMR spectrum of DDSQ-4H

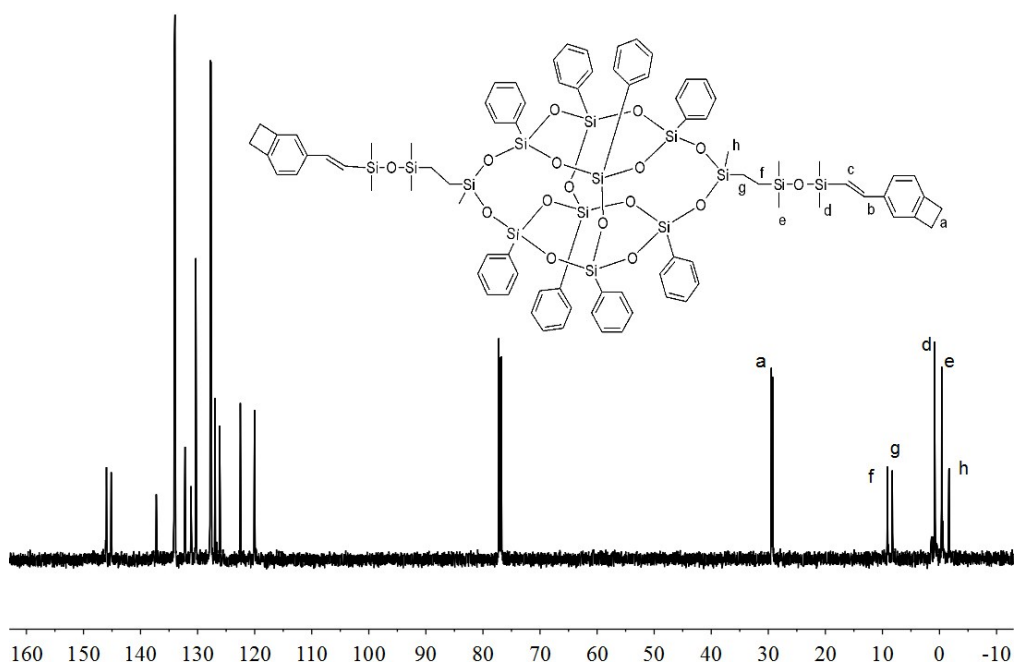

Fig. S5.  $^{13}\text{C}$  NMR spectrum of 2BCB-DDSQ

## Supporting Information

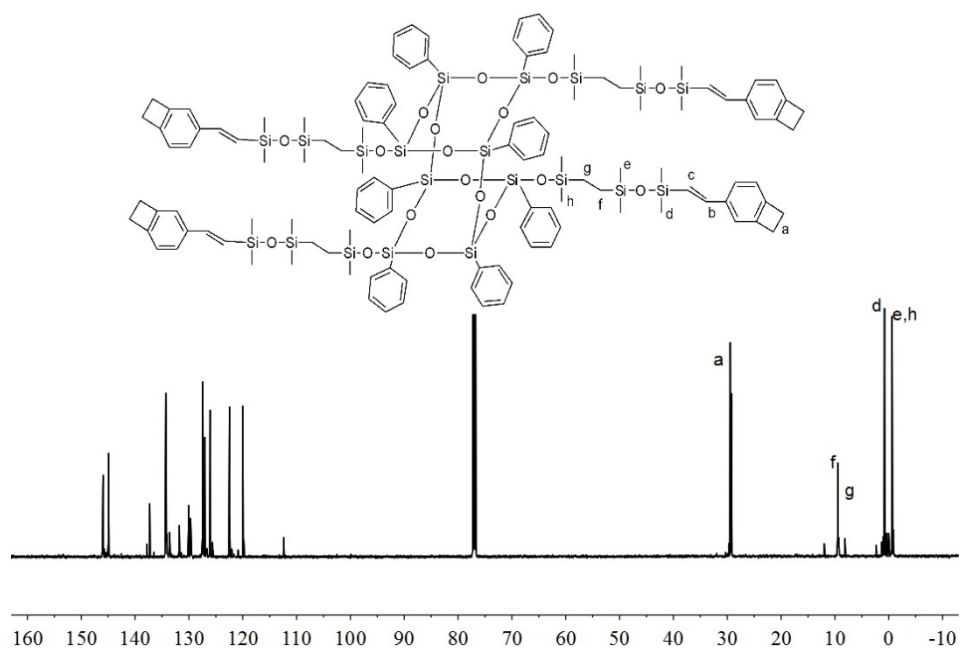

**Fig. S6.**  $^{13}\text{C}$  NMR spectrum of 4BCB-DDSQ

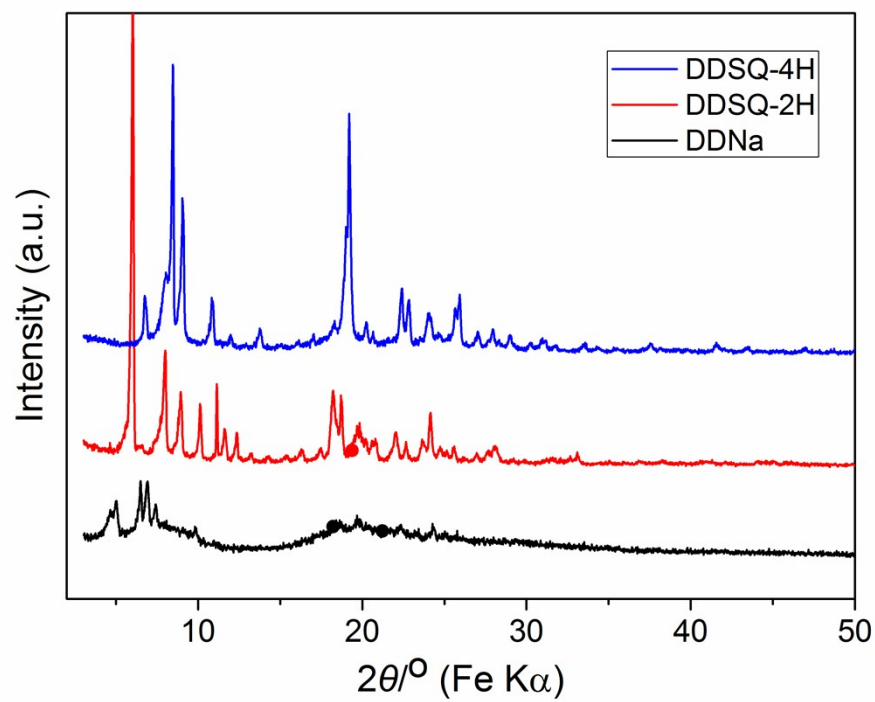

Fig. S7. XRD spectra of **DDNa**, **DDSQ-2H** and **DDSQ-4H**



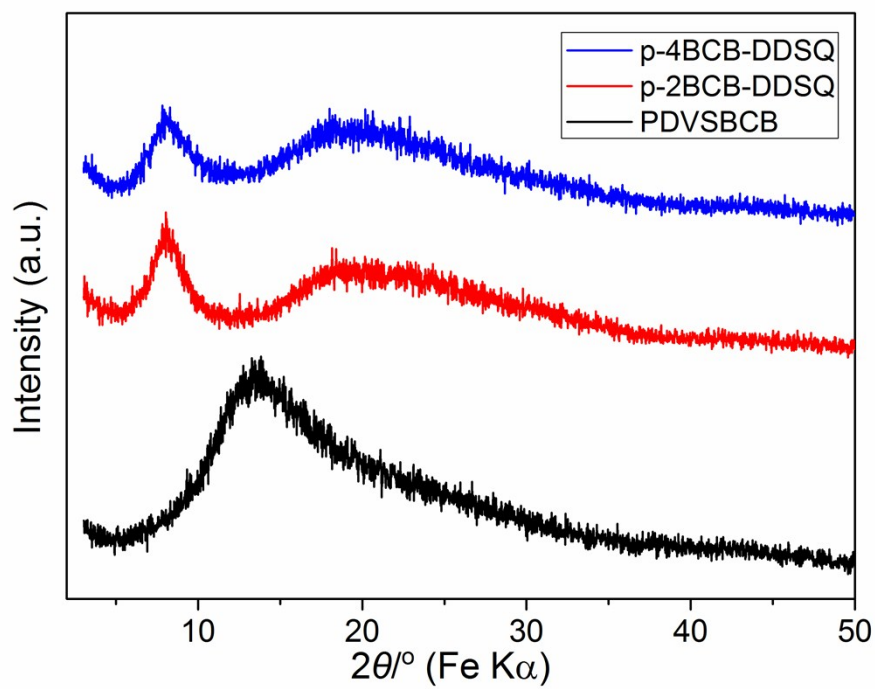

Fig. S8. XRD spectra of DVSBCB, p-2BCB-DDSQ and p-2BCB-DDSQ

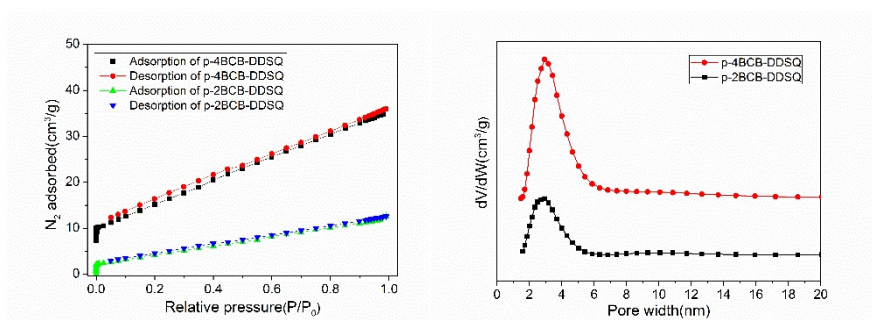

Fig. S9.  $N_2$  adsorption-desorption isotherms and BJH-analyzed pore-size distribution of **p-2BCB-**

**DDSQ** and **p-4BCB-DDSQ** resins

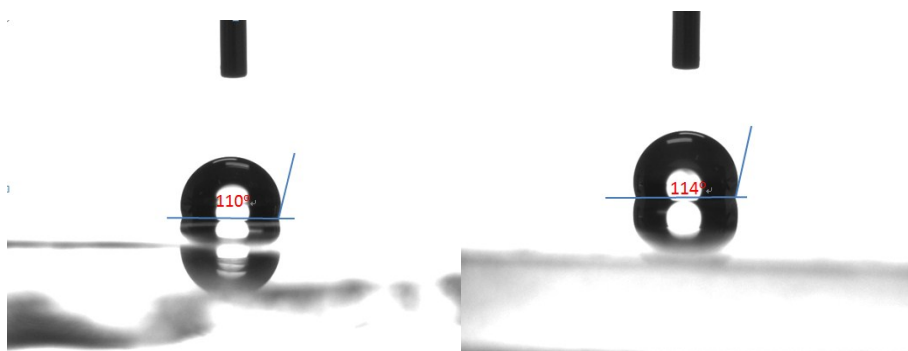

**Fig. S10.** Static contact angle of water on the surface of cured **BCB-DDSQ** resins

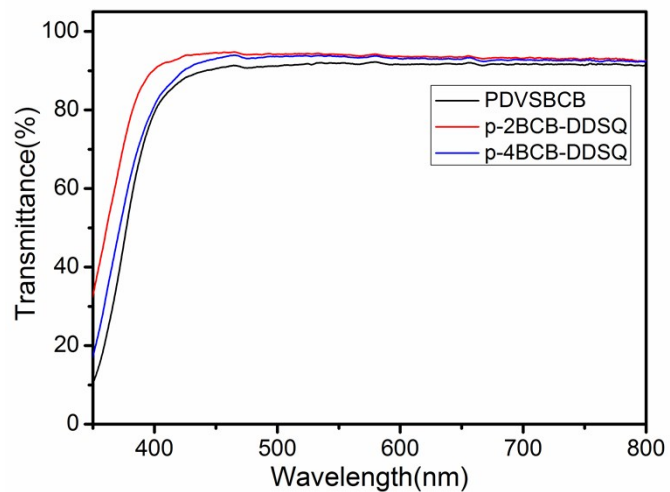

**Fig. S11.** The transmittance of cured **BCB-DDSQ** resins

## Supporting Information

**Table. S1** The data of nanoindentation tests for the **p-DVSBCB**, **p-2BCB-DDSQ** and **p-4BCB-DDSQ**

| sample             | Elastic modulus (GPa) |       |       |       | Hardness (GPa) |       |       |       |
|--------------------|-----------------------|-------|-------|-------|----------------|-------|-------|-------|
|                    | Test1                 | Test2 | Test3 | Test4 | Test1          | Test2 | Test3 | Test4 |
| <b>p-DVSBCB</b>    | 4.1                   | 3.8   | 4.3   | 4.2   | 0.28           | 0.25  | 0.30  | 0.28  |
| <b>p-2BCB-DDSQ</b> | 3.0                   | 2.8   | 2.9   | 3.0   | 0.17           | 0.16  | 0.16  | 0.18  |
| <b>p-4BCB-DDSQ</b> | 2.6                   | 2.8   | 2.9   | 2.6   | 0.14           | 0.17  | 0.17  | 0.13  |
